# Supplementary material
Source: PubMed Central journal article supplement (PMC6246910)
Supplement: zii999092607s1.pdf [file zii999092607s1.pdf]

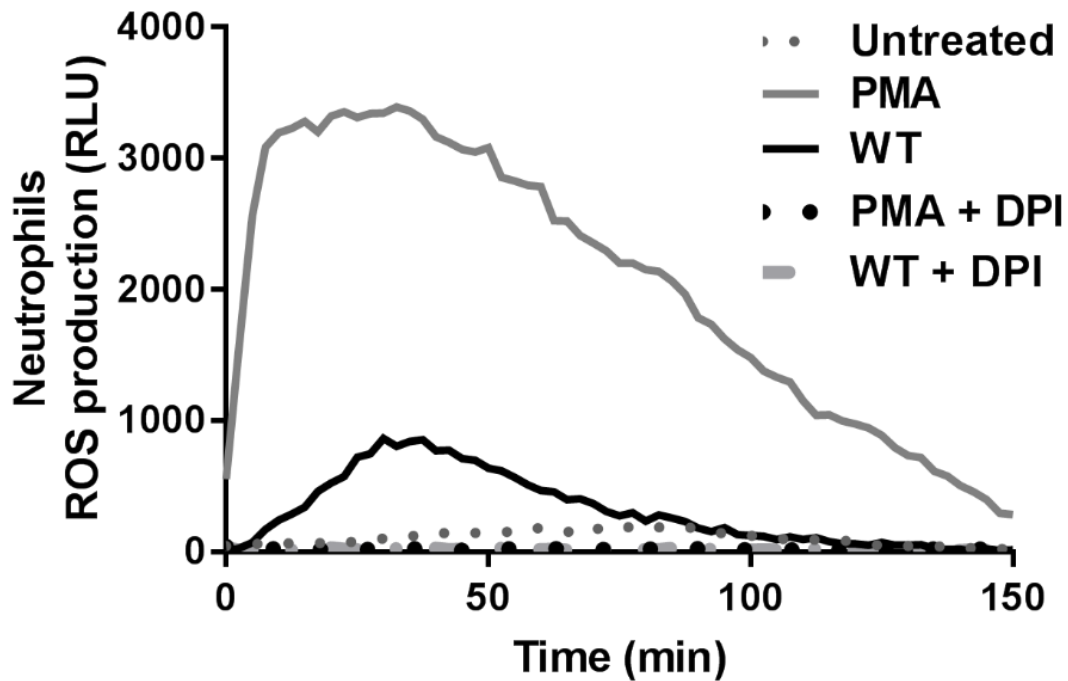

**FIG S1. DPI blocks ROS production in human neutrophils activated with *C. albicans* or PMA.** (A) Human blood derived neutrophils (H-PMN) were pretreated with diphenyleneiodonium chloride (DPI) for 15 min at 37°C. ROS production upon incubation with *C. albicans* WT or PMA was detected using luminol over 150 min at 37°C. As controls, neutrophils were left untreated (negative) or incubated with *C. albicans* WT or PMA (positive), shown is one representative replicate.
